# Supplementary material for: Litigation Meets Evidence: A Novel Approach to Understanding Preventable Complications in Breast Reconstruction
Source: Research Square preprint supplement (doi:10.21203/rs.3.rs-7451174/v1), 2025-09-11
Supplement: Supplementary file 2 [file 9aa8fe068f1f87de42ffc04a.docx]

Supplementary Table 1. Overview of Included RCTs

| **First Author** | **Year** | **N** | **Primary Outcome** | **Key Finding** |
| --- | --- | --- | --- | --- |
| Davison SP | 2024 | 110 breasts | Complications | DermACELL better than AlloDerm  (seroma, incorporation) |
| Wong JS | 2024 | 400 | 6-mo PWB change, chest wall toxicity | HF PMRT is as safe as CF; in <45y,  HF improves QOL |
| Hwang JW | 2024 | 276 breasts | Skin complication rate,  nipple necrosis | IV PGE1 reduces necrosis |
| Mendenhall SD | 2023 | 167 breasts | Complication rate, patient satisfaction | AlloDerm = DermaMatrix outcomes |
| Xia Z | 2023 | 122 | Recovery, pain,  opioid use | ERAS improves outcomes,  reduced pain and opioid use |
| Song D | 2023 | 389 | Venous congestion,  flap necrosis rates,  flap safety | Pedicle length measurement reduces venous congestion and  flap necrosis after DIEP flap |
| Mutter RW | 2023 | 82 | Complications | HF proton PMRT was as safe as conventional |
| Colakoglu S | 2022 | 63 flaps | Flap dissection,  OR time,  complications | Preoperative CTA reduces flap dissection and OR time, with no difference in complications |
| Muller-Sloof E | 2022 | 75 | Donor-site wound dehiscence | ciNPWT reduces dehiscence  (19.4% vs 41%) |
| Hanson E | 2022 | 46 | Fat necrosis,  complications | No difference between fat processing techniques; prior BCT increases  necrosis risk |
| Tallroth L | 2021 | 73 | Complications, QOL | DIEP higher satisfaction but  more complications |
| Hansson E | 2021 | 48 breasts | Complications | Synthetic mesh superior to biological mesh |
| Asaad M | 2021 | 103 breasts | Complications | Similar outcomes HADM vs BADM |
| Lembo F | 2021 | 49 | Seroma rate, QOL | Early drain removal safe; reduces seroma, improves QoL |
| Tokumoto H | 2021 | 140 | Drain volume,  drain removal days | AFG reduces drainage and  drainage period at donor site |
| Broyles JM | 2021 | 384 breasts | Matrix complications | No difference FlexHD vs AlloDerm |
| Suh YC | 2020 | 60 | Drainage | Hydrochlorothiazide (25mg/day)  reduces drainage |
| Anker AM | 2020 | 44 | Flap Perfusion | No difference vasopressor vs fluids |
| Brorson F | 2020 | Not specified | Complications | Similar rates TD (Implant) vs  Tissue expander, Similar rates LD (Implant) vs DIEP flap |

*AFG: Autologous fibrin glue; BADM: Bovine acellular dermal matrix; CF: Conventional fractionation; ciNPWT: Closed-incision negative pressure wound therapy; CTA: CT angiography; ERAS: Enhanced recovery after surgery; HADM: Human acellular dermal matrix; HF: Hypofractionation; LD: Latissimus dorsi muscle flap; PMRT: Postmastectomy radiation therapy; PWB: Physical well-being; QOL: Quality of life; TD: Thoracodorsal artery perforator flap

1

1 Pinell-White, X. A., Kapadia, S. M. & Losken, A. The management of abdominal contour defects following TRAM flap breast reconstruction. *Aesthetic Surgery Journal* **34**, 264-271 (2014).
